# Supplementary material for: Designing for Deep Thinking: A Theory-Driven Inquiry into Problem-Chain Teaching in Primary Mathematics
Source: Research Square preprint supplement (doi:10.21203/rs.3.rs-6782865/v1), 2025-07-14
Supplement: Supplementary file 1 [file 220f260fca2e4dc7a47667d9.docx]

**Appendix 1**

Dear students,

Hello! Thank you very much for taking the time to complete this small survey on higher-order thinking. This survey is anonymous and is only used for research purposes. It will not affect your academic performance. There are no right or wrong answers in the questionnaire, so please feel free to answer. Please read the questions carefully and tick (√) in the corresponding column according to your actual situation. Each question has only one answer. Do not select multiple answers or miss any. Thank you for your support, and I wish you progress in your studies!

| **Dimension** | **Question** | **6** | **5** | **4** | **3** | **2** | **1** |
| --- | --- | --- | --- | --- | --- | --- | --- |
| **Problem-Solving Ability** | 1. When doing math problems, I can form a general problem-solving idea in my mind. |  |  |  |  |  |  |
| 2. I can apply the mathematical knowledge I have learned to solve practical problems in real life. |  |  |  |  |  |  |
| | 3. When I encounter difficult problems, I will actively seek help from teachers or classmates to find solutions together. | | --- | |  |  |  |  |  |  |
| 4. When I encounter a problem, I will keep trying different ideas until I solve it. |  |  |  |  |  |  |
| 5. I am good at learning from mistakes. When I make mistakes in problem-solving, I will reflect and adjust my problem-solving ideas. |  |  |  |  |  |  |
| 6. When solving math problems, I will try to break down complex problems into simpler sub-problems to find solutions more easily. |  |  |  |  |  |  |
| 7. When facing complex math problems, I will stay calm and patient, and gradually analyze to find the breakthrough point of the problem. |  |  |  |  |  |  |
| **Critical Thinking** | 8. When learning new knowledge, I always look for relevant theoretical basis to support my understanding. |  |  |  |  |  |  |
| 1. When I have doubts about the explanations in textbooks or by teachers, I will bravely raise them and seek reasonable explanations. |  |  |  |  |  |  |
| 10. I often reflect on and question myself to test my viewpoints and ensure they are reasonable and well-founded. |  |  |  |  |  |  |
| 11. When I encounter a situation where my opinion differs from others', I will stick to my own ideas. |  |  |  |  |  |  |
| 12. I think that even the viewpoints in textbooks need to be reasonably demonstrated and tested before they can be accepted. |  |  |  |  |  |  |
| 13. When facing complex problems, I will question and analyze from different angles to form a more comprehensive and in-depth understanding. |  |  |  |  |  |  |
| 14. If people disagree with another person's viewpoint, they should have reasons. |  |  |  |  |  |  |
| **Creative Thinking** | 15. During the process of learning math, I can always come up with new ideas. |  |  |  |  |  |  |
| 16. I like to try different methods to solve the same math problem to see which method is better. |  |  |  |  |  |  |
| 17. In math learning, I can come up with more concise problem-solving methods than other classmates. |  |  |  |  |  |  |
| 18. I like to combine math knowledge with that of other disciplines, which helps me better understand math. |  |  |  |  |  |  |
| | 19. When I encounter difficult problems, I will try to find similar examples in daily life to help me understand. | | --- | |  |  |  |  |  |  |
| 20. I often imagine the application scenarios of math formulas or concepts in real life. |  |  |  |  |  |  |
| 21. When learning math, I will try to create some new problems or challenges on my own. |  |  |  |  |  |  |

**Appendix 2** Primary School Grade 4 Math High - Order Thinking Skills Test Paper

**Test Time**: 90 minutes

**Total Score**: 100 points

**Proposition Dimensions**: Problem - Solving Ability (30 points), Critical Thinking (30 points), Creative Thinking (40 points)

**I. Problem - Solving Ability (30 points)**

**Question 1 (10 points)**

*The school library needs to sort 450 books and distribute them to 5 bookshelves. Each bookshelf should have at least 80 books, and the number of books on each bookshelf is different. Please design a distribution plan and explain the reasons.*

**Scoring Rules:**

1. Problem Analysis (3 points): Correctly extract the conditions of "5 bookshelves", "at least 80 books", and "different numbers" (3 points for correct extraction, 1 point deducted for each missing item).
2. Strategy Selection (4 points): Use inequalities or enumeration methods (2 points), and try different combinations (2 points).
3. Execution and Verification (3 points): List a reasonable distribution plan (such as 80, 81, 82, 83, 124) and verify the total (3 points).

**Question 2 (10 points)**

*Use a 24 - centimeter - long iron wire to form a rectangle. Both the length and width are whole - centimeter numbers. How to enclose it to get the largest area? The smallest? Please write down the process.*

**Scoring Rules:**

1. Problem Analysis (2 points): Clearly understand the relationship between the area and the length and width when the perimeter is fixed (2 points).
2. Strategy Selection (4 points): List all possible lengths and widths (3 points), and calculate and compare the areas (1 point).
3. Execution and Verification (4 points): Correctly obtain the largest (36 cm²) and the smallest (11 cm²) areas (2 points for each correct answer).

**Question 3 (10 points)**

*Xiaoming bought 3 pens and 2 notebooks and spent a total of 21 yuan. Given that a pen is 1 yuan more expensive than a notebook, find the unit price of the pen and the notebook.*

**Scoring Rules:**

1. Problem Analysis (3 points): Establish an equation or substitution relationship (3 points).
2. Strategy Selection (4 points): Solve the problem using algebraic methods or the assumption method (4 points).
3. Execution and Verification (3 points): Correctly calculate the unit price of the pen (5 yuan) and the notebook (4 yuan) (3 points).

**II. Critical Thinking (30 points)**

**Question 4 (10 points)**

*Xiaohong said: "Since 3.2÷0.8 = 4, 3.2 is a multiple of 0.8." Do you agree? Why?*

**Scoring Rules:**

1. Hypothesis Identification (3 points): Point out that the concept of multiples only applies to integers (3 points).
2. Evidence Evaluation (4 points): Refute with mathematical definitions (4 points).
3. Counter - Example Construction (3 points): Give an example to illustrate that there is no multiple relationship between decimals (such as 0.8×4 = 3.2, but not an integer multiple) (3 points).

**Question 5 (10 points)**

*Judge: Two triangles with equal areas must be able to form a parallelogram. Is it right? Draw a picture to illustrate.*

**Scoring Rules:**

1. Hypothesis Identification (3 points): Point out that the shapes need to be the same (3 points).
2. Evidence Evaluation (4 points): Draw triangles with equal areas but different shapes (4 points).
3. Counter - Example Construction (3 points): Explain that they cannot be combined into a parallelogram (3 points).

**Question 6 (10 points)**

*Calculate: 25×4÷25×4. Xiaoming's answer is 1. Do you think it is right? Why?*

**Scoring Rules:**

1. Hypothesis Identification (3 points): Point out the wrong order of operations (3 points).
2. Evidence Evaluation (4 points): Calculate with the correct order of operations (4 points).
3. Counter - Example Construction (3 points): Compare Xiaoming's answer with the correct answer (3 points).

**III. Creative Thinking (40 points)**

**Question 7 (10 points)**

*Design a math game. Use 12 squares with a side length of 1 centimeter to form figures with different perimeters. Draw 3 design diagrams and write down the perimeters.*

**Scoring Rules:**

1. Novelty of Method (3 points): Break through regular rectangles (such as L - shaped, T - shaped) (3 points).
2. Diversity of Perspectives (4 points): Combine geometric shapes with the perimeter formula (4 points).
3. Innovation of Model (3 points): Discover the rule that the area is the same but the perimeters are different (3 points).

**Question 8 (15 points)**

*Use the 9 numbers from 1 to 9, each number can only be used once, to form three three - digit numbers so that their sum is equal to 1998. Write down your combination method.*

**Scoring Rules:**

1. Novelty of Method (5 points): Try different digital combination strategies (5 points).
2. Diversity of Perspectives (5 points): Analyze from multiple dimensions such as carry - over and the last - digit numbers (5 points).
3. Innovation of Model (5 points): Propose effective combination rules (such as the sum of the last - digit numbers is 18, and the sum of the hundreds - digit numbers is 18) (5 points).

**Question 9 (15 points)**

*If a square paper is folded 3 times and then unfolded, how many creases will there be on the paper? Try to explain it with a mathematical method.*

**Scoring Rules:**

1. Novelty of Method (5 points): Analyze with recurrence or geometric methods (5 points).
2. Diversity of Perspectives (5 points): Combine the relationship between the number of folds and the number of creases (5 points).
3. Innovation of Model (5 points): Discover the crease - number formula (2ⁿ - 1, where n is the number of times) (5 points).

**Appendix 3**

Detailed Lesson Plan: Problem-Chain Teaching Approach in Grade 4 Mathematics

Lesson Topic: Integrating Area and Perimeter

Grade Level: Grade 4

Lesson Duration: 45 minutes

Learning Objectives:

Students will clearly differentiate between the concepts of area and perimeter.

Students will apply their understanding of area and perimeter to solve authentic problems.

Students will develop higher-order thinking skills, including problem-solving, critical thinking, and creative thinking.

Students will collaborate effectively and communicate their mathematical ideas clearly.

Materials:

Interactive whiteboard and presentation slides

Rectangular and square paper cut-outs

Tape measures or rulers

Student activity sheets (group record sheets)

Lesson Outline:

Preparation (5 minutes)

Teacher introduces the lesson objective and briefly reviews the concepts of area and perimeter, ensuring students recall the definitions and formulas (e.g., perimeter of rectangle = 2 × (length + width), area of rectangle = length × width).

Orientation (5 minutes)

Teacher presents an authentic problem scenario: “The floor of our classroom is damaged. The principal needs our help to design a new flooring plan. How should we start?”

Students briefly discuss and share initial ideas about what information they need.

Conceptualization (8 minutes)

Teacher initiates a problem-chain to scaffold thinking:

“What do we need to know before designing the flooring?” (students discuss measurements needed)

“How can we measure the classroom?” (teacher demonstrates measurement methods)

“Once measured, how do we use these measurements to find out the flooring needed?”

Groups discuss, with the teacher facilitating a summary of the differences and relationships between area and perimeter.

Investigation (12 minutes)

Teacher distributes paper cut-outs representing floor tiles of different sizes.

Students work in groups to measure their desks or defined classroom areas and develop flooring designs using different tile sizes.

Teacher poses additional questions: “Which design uses fewer tiles? Which design would be more cost-effective or more aesthetically pleasing?”

Conclusion (5 minutes)

Each group presents their design, explaining their choice of tiles, calculations of area, and perimeter.

Teacher summarizes strengths and weaknesses of each design, emphasizing real-life application and mathematical accuracy.

Discussion (5 minutes)

Teacher facilitates a class discussion: “Which design do you prefer and why? How do area and perimeter calculations influence your decision?”

Students exchange ideas, considering practical, economic, and aesthetic factors.

Evaluation & Reflection (5 minutes)

Students complete their activity record sheets, reflecting on their group's collaborative efforts, the accuracy of their calculations, and their understanding of area versus perimeter.

Teacher provides immediate feedback and addresses any misconceptions.

Post-lesson Extension Activity:

Students design a flooring plan for a room at home, calculating both area and perimeter, and discuss the practicality and efficiency of their design with family members.

Assessment:

Teacher observations during discussions and group work

Group activity sheets and reflection records

Informal questioning during class discussions

Reflection Notes:

Evaluate students' depth of understanding regarding area and perimeter concepts.

Reflect on students' collaborative and problem-solving skills development to inform future instructional planning.
